# Supplementary material for: Phytochemical Composition of Commiphora Oleogum Resins and Their Cytotoxicity against Skin Cancer Cells
Source: MDPI journal article supplement (doi:10.3390/molecules27123903), 2022-06-17
Supplement: s1 [file s1]

# Phytochemical Composition of *Commiphora* Oleogum Resins and their Cytotoxicity against Skin Cancer Cells

Judith Ulrich <sup>1,†</sup>, Svenja Stiltz <sup>1,†</sup>, Alexis St-Gelais <sup>2</sup>, Menna El Gaafary <sup>1,3</sup>, Thomas Simmet <sup>1</sup>, Tatiana Syrovets <sup>1</sup> and Michael Schmiech <sup>1,\*</sup>

<sup>1</sup> Institute of Pharmacology of Natural Products and Clinical Pharmacology, Ulm University, 89081 Ulm, Germany; judith.ulrich@uni-ulm.de (J.U.), svenja.stiltz@winsie.de (S.S.), mennat\_elgaafary@yahoo.com (M.E.), thomas.simmet@uni-ulm.de (Th.S.), tatiana.syrovets@uni-ulm.de (Ta.S.)

<sup>2</sup> Laboratoire PhytoChemia, Saguenay, QC G7J 1H4, Canada; a.st-gelais@phytochemia.com (A.S.-G.)

<sup>3</sup> Department of Pharmacognosy, College of Pharmacy, Cairo University, Cairo 11562, Egypt

\* Correspondence: michael.schmiech@uni-ulm.de (M.S.); Tel.: +49-731-500-65622

<sup>†</sup> These authors contributed equally to this work

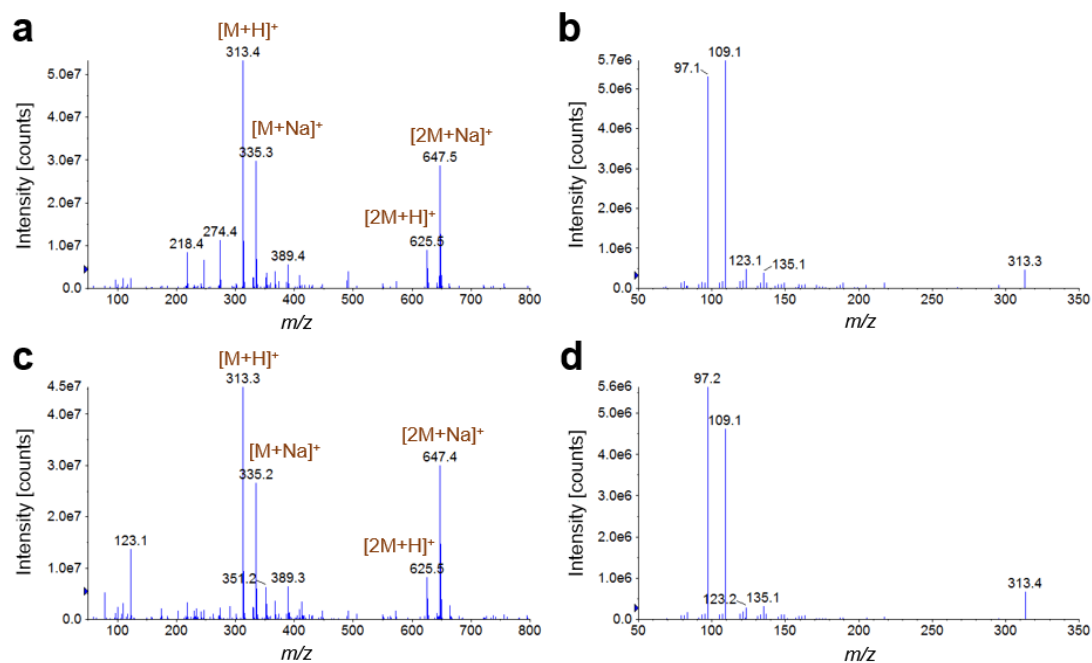

**Figure S1.** Mass spectra of (*E*)-guggulsterone and (*Z*)-guggulsterone with positive ionization mode (centroided). (a) Mass spectrum of (*E*)-guggulsterone. (b) Product ion mass spectrum of (*E*)-guggulsterone with  $m/z$  313 as precursor ion. (c) Mass spectrum of (*Z*)-guggulsterone. (d) Product ion mass spectrum of (*Z*)-guggulsterone with  $m/z$  313 as precursor ion.

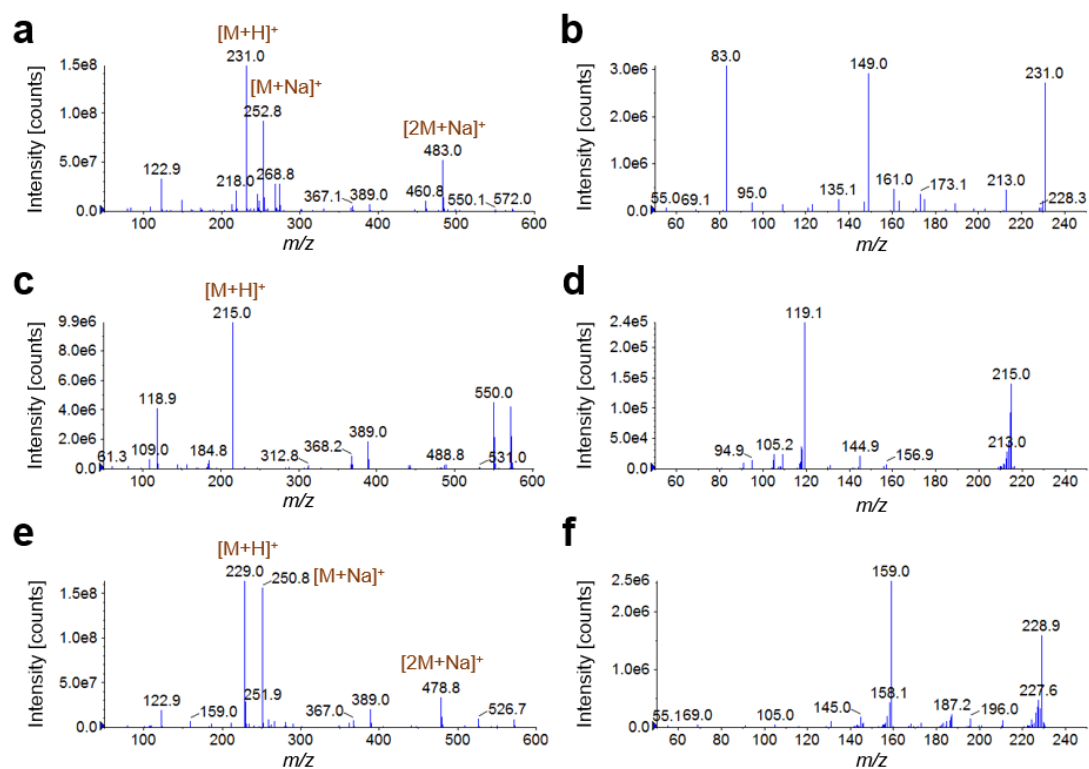

**Figure S2.** Mass spectra of curzerenone, furanoeudesma-1,3-diene, and myrrhone with positive ionization mode (centroided). (a) Mass spectrum of curzerenone. (b) Product ion mass spectrum of curzerenone with  $m/z$  231 as precursor ion. (c) Mass spectrum of furanoeudesma-1,3-diene. (d) Product ion mass spectrum of furanoeudesma-1,3-diene with  $m/z$  215 as precursor ion. (e) Mass spectrum of myrrhone. (f) Product ion mass spectrum of myrrhone with  $m/z$  229 as precursor ion.

**Table S1.** Design of Experiments (DoE) for optimization of chromatographic parameters for selective and rapid guggulsterone analysis. Level conditions for three independent variables: Variable A (starting concentrations of eluent B), variable B (slope of gradient), and variable C (flow rate of eluent). As response, two dependent variables were investigated: chromatographic resolution ( $R$ ) and averaged retention time ( $\bar{t}_R$ ) of (*E*)-guggulsterone and (*Z*)-guggulsterone.  $\alpha = 1.682$ .

| Exp. | Independent variables, uncoded (coded) |                    |                     | Dependent variables |                   |
|------|----------------------------------------|--------------------|---------------------|---------------------|-------------------|
|      | A [%]                                  | B [%/min]          | C [mL/min]          | $R$                 | $\bar{t}_R$ [min] |
| 1    | 32.0 (-1)                              | 2.00 (-1)          | 0.400 (-1)          | 3.78                | 23.8              |
| 2    | 68.0 (1)                               | 2.00 (-1)          | 0.400 (-1)          | 1.99                | 7.3               |
| 3    | 32.0 (-1)                              | 4.00 (1)           | 0.400 (-1)          | 2.90                | 15.9              |
| 4    | 68.0 (1)                               | 4.00 (1)           | 0.400 (-1)          | 1.77                | 6.7               |
| 5    | 32.0 (-1)                              | 2.00 (-1)          | 0.600 (1)           | 4.33                | 20.5              |
| 6    | 68.0 (1)                               | 2.00 (-1)          | 0.600 (1)           | 1.99                | 5.2               |
| 7    | 32.0 (-1)                              | 4.00 (1)           | 0.600 (1)           | 3.34                | 13.5              |
| 8    | 68.0 (1)                               | 4.00 (1)           | 0.600 (1)           | 1.93                | 4.8               |
| 9    | 19.7 ( $-\alpha$ )                     | 3.00 (0)           | 0.500 (0)           | 4.40                | 21.3              |
| 10   | 80.3 ( $\alpha$ )                      | 3.00 (0)           | 0.500 (0)           | 1.27                | 3.2               |
| 11   | 50.0 (0)                               | 1.32 ( $-\alpha$ ) | 0.500 (0)           | 3.59                | 15.5              |
| 12   | 50.0 (0)                               | 4.68 ( $\alpha$ )  | 0.500 (0)           | 2.43                | 9.4               |
| 13   | 50.0 (0)                               | 3.00 (0)           | 0.332 ( $-\alpha$ ) | 2.87                | 14.1              |
| 14   | 50.0 (0)                               | 3.00 (0)           | 0.668 ( $\alpha$ )  | 3.28                | 9.6               |
| 15   | 50.0 (0)                               | 3.00 (0)           | 0.500 (0)           | 2.94                | 11.3              |

**Table S2.** Quantification of (*E*)-guggulsterone, (*Z*)-guggulsterone, curzerenone, furanoeudesma-1,3-diene, and myrrhone in *Commiphora* oleogum resin extracts and botanical drugs. Analysis by HPLC-MS/MS, in duplicates. Contents below limit of quantification or detection (<LOQ/<LOD) are indicated as “-”.

| Species (origin)                 | Contents of guggulsterones and furanosesquiterpenoids in<br><i>Commiphora</i> extracts or botanical drugs [ $\mu\text{g}/\text{mg}$ ] |                            |             |                         |          |
|----------------------------------|---------------------------------------------------------------------------------------------------------------------------------------|----------------------------|-------------|-------------------------|----------|
|                                  | ( <i>E</i> )-Guggulsterone                                                                                                            | ( <i>Z</i> )-Guggulsterone | Curzerenone | Furanoeudesma-1,3-diene | Myrrhone |
| <i>C. myrrha</i> (Somalia)       | –                                                                                                                                     | –                          | 0.099       | 328.500                 | 0.004    |
| <i>C. erythraea</i> (Somalia)    | –                                                                                                                                     | –                          | 2.180       | –                       | 0.755    |
| <i>C. mukul</i> (Nepal)          | 3.555                                                                                                                                 | 8.290                      | –           | –                       | –        |
| <i>C. kataf</i> (Kenya)          | –                                                                                                                                     | –                          | 2.710       | –                       | 4.110    |
| <i>C. holtziana</i> (Kenya)      | –                                                                                                                                     | –                          | 14.950      | 102.000                 | 0.557    |
| <i>C. confusa</i> (Kenya)        | –                                                                                                                                     | –                          | 0.006       | –                       | –        |
| <i>C. kua</i> (Socotra, Yemen)   | –                                                                                                                                     | –                          | –           | –                       | –        |
| <i>C. from Tarraxo</i> (Somalia) | –                                                                                                                                     | –                          | 54.700      | –                       | 0.174    |
| <i>C. from Ogaden</i> (Ethiopia) | 0.956                                                                                                                                 | 0.610                      | 7.740       | –                       | 3.045    |
| Myrrhinil-Intest®                | –                                                                                                                                     | –                          | 0.016       | 0.456                   | 0.007    |
| Gugulipid®                       | 7.410                                                                                                                                 | 12.100                     | –           | –                       | –        |

**Table S3.** Analysis of essential oils in *Commiphora* oleogum resins. Relative quantification by gas chromatography and flame ionization detection (GC-FID) using internal normalization, areas in uncorrected %. List of components with area >0.2% in at least one sample. Retention indices (RI) using DB-5 or DB-Wax columns. Hydrodistillation of *Commiphora* oleogum resin from Tarraxo (Somalia) yielded no essential oil. Traces tr <0.05%. Main ions of unknown compounds and substance groups are shown in the footnote.

| Compound                                        | Retention indices (RI) |        | Content [%]                   |                                  |                            |                            |                                |                              |                                   |                                        |
|-------------------------------------------------|------------------------|--------|-------------------------------|----------------------------------|----------------------------|----------------------------|--------------------------------|------------------------------|-----------------------------------|----------------------------------------|
|                                                 | DB-5                   | DB-Wax | <i>C. myrrha</i><br>(Somalia) | <i>C. erythraea</i><br>(Somalia) | <i>C. mukul</i><br>(Nepal) | <i>C. kataf</i><br>(Kenya) | <i>C. holtziana</i><br>(Kenya) | <i>C. confusa</i><br>(Kenya) | <i>C. kua</i><br>(Socotra, Yemen) | <i>C. from</i><br>Ogaden<br>(Ethiopia) |
| Toluene                                         | 761                    | 1004   | –                             | –                                | tr                         | –                          | –                              | 0.2                          | –                                 | –                                      |
| $\alpha$ -Thujene                               | 926                    | 1000   | –                             | tr                               | 0.2                        | 0.2                        | 0.1                            | 9.0                          | –                                 | tr                                     |
| $\alpha$ -Pinene                                | 930                    | 994    | –                             | 0.5                              | 8.5                        | 5.8                        | 0.8                            | 39.5                         | tr                                | 0.5                                    |
| Camphene                                        | 943                    | 1027   | –                             | tr                               | 0.5                        | 0.2                        | tr                             | 0.7                          | –                                 | tr                                     |
| Unknown I                                       | 943                    | 1095   | –                             | –                                | –                          | tr                         | –                              | 1.0                          | –                                 | –                                      |
| Thuja-2,4(10)-diene                             | 949                    | 1086   | –                             | tr                               | 0.1                        | 0.1                        | tr                             | 0.9                          | –                                 | –                                      |
| 3,7,7-Trimethyl-<br>cyclohepta-1,3,5-<br>triene | 965                    | 1135   | –                             | –                                | 2.2                        | –                          | –                              | tr                           | –                                 | –                                      |
| $\beta$ -Pinene                                 | 971                    | 1066   | –                             | 0.1                              | 2.0                        | 3.5                        | 0.1                            | 8.9                          | –                                 | 0.1                                    |
| Sabinene                                        | 971                    | 1086   | –                             | tr                               | 0.2                        | 0.3                        | tr                             | 1.1                          | –                                 | tr                                     |
| Menthatriene<br>unidentified isomer             | 999                    | 1176   | –                             | –                                | tr                         | tr                         | –                              | 0.3                          | –                                 | –                                      |
| $\Delta^3$ -Carene                              | 1007                   | 1111   | –                             | tr                               | 29.8                       | tr                         | –                              | –                            | –                                 | tr                                     |
| <i>ortho</i> -<br>Methylanisole                 | 1007                   | 1363   | –                             | 0.1                              | –                          | –                          | –                              | 0.5                          | –                                 | tr                                     |
| $\alpha$ -Terpinene                             | 1014                   | 1140   | –                             | –                                | 0.3                        | 0.1                        | –                              | 0.3                          | –                                 | –                                      |
| <i>meta</i> -Cymene                             | 1019                   | 1229   | –                             | –                                | 0.4                        | –                          | –                              | 0.1                          | –                                 | –                                      |
| <i>para</i> -Cymene                             | 1021                   | 1228   | –                             | 0.1                              | 2.1                        | 0.2                        | 0.1                            | 10.0                         | –                                 | 0.1                                    |
| Sylvestrene                                     | 1023                   | 1156   | –                             | –                                | 0.8                        | –                          | –                              | –                            | –                                 | –                                      |
| Limonene                                        | 1026                   | 1158   | 0.1                           | 0.1                              | 1.2                        | 0.2                        | 0.1                            | 1.1                          | 0.1                               | 0.1                                    |
| $\beta$ -Phellandrene                           | 1026                   | 1165   | –                             | –                                | 0.1                        | –                          | –                              | 0.2                          | –                                 | –                                      |
| $\gamma$ -Terpinene                             | 1056                   | 1206   | –                             | –                                | 0.4                        | 0.1                        | tr                             | 0.5                          | –                                 | tr                                     |
| Unknown II                                      | 1067                   | 1279   | –                             | –                                | 0.1                        | –                          | –                              | 0.2                          | –                                 | –                                      |
| <i>meta</i> -Cymenene                           | 1079                   | 1381   | –                             | –                                | 0.6                        | –                          | –                              | –                            | –                                 | –                                      |
| Terpinolene                                     | 1086                   | 1241   | –                             | –                                | 0.7                        | tr                         | –                              | 0.2                          | –                                 | tr                                     |
| <i>para</i> -Cymenene                           | 1086                   | 1388   | –                             | –                                | 0.8                        | tr                         | –                              | 0.6                          | –                                 | –                                      |
| <i>endo</i> -Fenchol                            | 1109                   | 1542   | –                             | –                                | 0.3                        | tr                         | –                              | 0.2                          | –                                 | –                                      |
| $\beta$ -Thujone                                | 1111                   | 1387   | –                             | –                                | –                          | –                          | tr                             | 1.0                          | –                                 | –                                      |
| $\alpha$ -Campholenal                           | 1121                   | 1437   | –                             | –                                | 0.1                        | 0.1                        | –                              | 0.4                          | –                                 | –                                      |
| Nopinone                                        | 1129                   | 1512   | –                             | –                                | –                          | –                          | –                              | 0.2                          | –                                 | –                                      |
| <i>trans</i> -Pinocarveol                       | 1132                   | 1605   | –                             | –                                | 0.3                        | 0.3                        | 0.1                            | 2.0                          | tr                                | tr                                     |
| <i>trans</i> -Verbenol                          | 1141                   | 1633   | –                             | –                                | 0.1                        | 0.1                        | –                              | 0.5                          | tr                                | tr                                     |
| <i>meta</i> -Mentha-4,6-<br>dien-8-ol           | 1146                   | 1615   | –                             | –                                | 0.1                        | 0.1                        | –                              | 0.6                          | –                                 | –                                      |
| Pinocamphone                                    | 1156                   | 1454   | –                             | –                                | 0.1                        | tr                         | –                              | 0.3                          | –                                 | –                                      |
| Pinocarvone                                     | 1157                   | 1509   | –                             | –                                | 0.3                        | tr                         | –                              | 0.5                          | –                                 | –                                      |
| Phellandrenol<br>isomer                         | 1157                   | 1674   | –                             | –                                | 0.4                        | –                          | –                              | –                            | –                                 | –                                      |
| Borneol                                         | 1161                   | 1653   | –                             | –                                | 0.1                        | tr                         | –                              | 0.2                          | –                                 | –                                      |
| $\alpha$ -Phellandren-<br>8-ol                  | 1164                   | 1683   | –                             | tr                               | 0.3                        | 0.2                        | –                              | 1.6                          | –                                 | tr                                     |

Table S3. *Cont.*

|                                             |      |      |     |      |      |      |     |     |     |      |
|---------------------------------------------|------|------|-----|------|------|------|-----|-----|-----|------|
| Umbellulone                                 | 1167 | 1581 | –   | –    | –    | –    | –   | 0.3 | –   | –    |
| <i>cis</i> -Sabinol                         | 1168 | 1743 | –   | –    | –    | –    | –   | 0.3 | –   | –    |
| Terpinen-4-ol                               | 1173 | 1557 | –   | tr   | 1.0  | 0.1  | tr  | 4.5 | tr  | tr   |
| <i>meta</i> -Cymen-8-ol                     | 1180 | 1798 | –   | –    | 1.2  | –    | –   | –   | –   | –    |
| <i>para</i> -Cymen-8-ol                     | 1183 | 1801 | –   | –    | 0.7  | tr   | –   | 0.7 | –   | –    |
| Unknown III                                 | 1186 | 1651 | –   | –    | 2.8  | –    | –   | –   | –   | –    |
| Myrtenal                                    | 1188 | 1564 | –   | –    | 0.2  | 0.3  | –   | 0.9 | –   | –    |
| $\alpha$ -Terpineol                         | 1188 | 1651 | –   | tr   | 1.3  | 0.1  | –   | 1.0 | –   | tr   |
| Myrtenol                                    | 1193 | 1743 | –   | –    | 0.2  | 0.2  | –   | 1.0 | tr  | –    |
| Verbenone                                   | 1202 | 1636 | –   | tr   | 1.3  | 0.1  | tr  | 1.6 | tr  | tr   |
| Octyl acetate                               | 1217 | 1444 | –   | –    | –    | –    | 0.3 | –   | –   | –    |
| <i>trans</i> -Carveol                       | 1217 | 1788 | –   | –    | 0.1  | tr   | –   | 0.3 | –   | –    |
| Cuminal                                     | 1234 | 1714 | –   | –    | 0.1  | –    | –   | 0.3 | –   | tr   |
| 3,5-Dimethoxy-<br>toluene                   | 1265 | 1782 | –   | –    | –    | 0.1  | –   | 0.3 | –   | –    |
| Bornyl acetate                              | 1285 | 1529 | –   | –    | 0.2  | 0.1  | –   | 0.1 | –   | –    |
| 4-Vinylguaicol                              | 1307 | 2129 | –   | –    | 0.7  | –    | –   | –   | –   | –    |
| $\delta$ -Elemene isomer                    | 1332 | 1427 | 0.1 | 0.1  | –    | 0.5  | 0.1 | –   | tr  | 0.1  |
| $\delta$ -Elemene                           | 1335 | 1432 | 2.0 | 1.1  | –    | 25.1 | 1.8 | –   | 0.9 | 1.8  |
| Bicycloelemene                              | 1335 | 1436 | 0.1 | –    | –    | 0.9  | 0.1 | –   | tr  | –    |
| Unknown IV                                  | 1338 | 1631 | –   | –    | 0.3  | –    | –   | –   | –   | –    |
| $\alpha$ -Longipinene                       | 1343 | 1416 | –   | –    | 0.7  | –    | –   | –   | –   | 0.5  |
| $\alpha$ -Cubebene                          | 1346 | 1418 | 0.1 | 0.6  | –    | 0.5  | 0.2 | –   | 0.6 | 0.4  |
| $\alpha$ -Terpinyl acetate                  | 1347 | 1645 | –   | –    | 1.1  | –    | –   | 0.1 | –   | –    |
| Cyclosativene I                             | 1358 | 1436 | –   | tr   | 0.2  | 0.3  | –   | –   | –   | –    |
| Longicyclene                                | 1361 | 1440 | –   | –    | 1.0  | –    | –   | –   | –   | –    |
| $\alpha$ -Ylangene                          | 1366 | 1436 | 0.1 | 0.3  | 0.1  | 0.3  | 0.1 | –   | 0.1 | 0.1  |
| $\alpha$ -Copaene                           | 1371 | 1444 | 0.4 | 1.3  | 0.1  | 1.4  | 2.2 | tr  | 1.5 | 0.6  |
| $\beta$ -Bourbonene                         | 1378 | 1469 | 1.2 | 5.2  | –    | 3.7  | 1.3 | –   | 0.9 | 2.1  |
| 1,5- <i>diepi</i> - $\beta$ -<br>Bourbonene | 1381 | 1461 | 0.1 | 0.5  | –    | 0.4  | 0.1 | –   | 0.1 | 0.2  |
| <i>cis</i> - $\beta$ -Elemene               | 1381 | 1533 | 0.3 | 0.2  | –    | –    | 0.2 | –   | –   | 0.3  |
| Sativene                                    | 1383 | 1471 | –   | –    | 0.6  | –    | –   | –   | –   | –    |
| $\beta$ -Cubebene                           | 1386 | 1491 | 0.1 | 0.1  | –    | 0.3  | 0.1 | –   | 0.2 | 0.2  |
| $\beta$ -Elemene                            | 1389 | 1544 | 9.1 | 11.1 | 0.1  | 4.7  | 9.6 | tr  | 0.9 | 12.8 |
| Longifolene                                 | 1397 | 1509 | –   | –    | 24.3 | –    | –   | –   | –   | –    |
| $\alpha$ -Gurjunene                         | 1403 | 1479 | 0.1 | tr   | –    | 0.1  | 0.1 | –   | 0.9 | 0.1  |
| $\beta$ -Ylangene                           | 1412 | 1520 | 0.2 | 0.9  | –    | 0.6  | 0.2 | –   | 0.2 | 0.6  |
| <i>cis</i> - $\alpha$ -<br>Bergamotene      | 1412 | 1526 | 0.2 | –    | –    | 1.2  | 0.5 | –   | –   | 0.1  |
| $\beta$ -Caryophyllene                      | 1412 | 1540 | 0.7 | 1.1  | 0.7  | 1.2  | 0.9 | –   | 7.7 | 1.0  |
| Cascarilladiene                             | 1416 | 1520 | 0.2 | –    | –    | 0.3  | 0.2 | –   | –   | 0.5  |
| $\beta$ -Copaene                            | 1422 | 1536 | 0.4 | 1.1  | –    | 1.0  | 0.4 | –   | 0.3 | 0.7  |
| $\gamma$ -Elemene                           | 1430 | 1590 | 2.7 | 1.1  | –    | 0.5  | 1.8 | –   | 0.2 | 3.8  |
| <i>trans</i> - $\alpha$ -<br>Bergamotene    | 1433 | 1540 | 0.1 | 1.8  | –    | –    | 0.3 | –   | 0.4 | 0.9  |
| $\alpha$ -Guaiene                           | 1433 | 1543 | –   | –    | –    | 0.4  | –   | –   | –   | –    |
| 6,9-Guaiadiene                              | 1437 | 1557 | tr  | tr   | –    | 0.3  | tr  | –   | 0.1 | 0.1  |
| Isogermacrene D                             | 1437 | 1586 | 0.2 | 0.8  | –    | 0.5  | 0.2 | –   | –   | 0.4  |
| Unknown V                                   | 1442 | 1569 | –   | –    | –    | 0.7  | 0.2 | –   | 0.2 | –    |

Table S3. *Cont.*

|                                         |      |      |      |      |     |      |      |   |      |      |
|-----------------------------------------|------|------|------|------|-----|------|------|---|------|------|
| Unknown VI                              | 1444 | 1574 | –    | –    | –   | 0.4  | –    | – | 0.2  | –    |
| $\alpha$ -Humulene                      | 1445 | 1608 | 0.5  | 0.7  | 0.1 | 1.0  | 0.5  | – | 3.9  | 0.7  |
| <i>allo</i> -<br>Aromadendrene          | 1453 | 1586 | 0.1  | 0.3  | –   | 0.3  | 0.2  | – | 3.8  | 0.2  |
| <i>cis</i> -Cadina-1(6),4-<br>diene     | 1456 | 1586 | –    | 0.1  | –   | 0.1  | –    | – | 1.7  | 0.2  |
| <i>cis</i> -Muurolo-<br>4(15),5-diene   | 1459 | 1615 | –    | 0.3  | –   | 0.3  | –    | – | 0.2  | 0.2  |
| Unknown VII                             | 1466 | 1615 | 0.1  | 0.1  | –   | 0.7  | 0.1  | – | –    | 0.1  |
| <i>trans</i> -Cadina-<br>1(6),4-diene   | 1468 | 1605 | 0.1  | 0.3  | –   | 0.6  | 0.1  | – | 0.3  | 0.1  |
| Selina-4,11-diene                       | 1470 | 1620 | 0.3  | 0.2  | –   | –    | 0.4  | – | 0.4  | 0.2  |
| $\gamma$ -Muurolene                     | 1472 | 1633 | 0.2  | 1.7  | –   | 1.6  | 0.6  | – | 2.0  | 1.0  |
| Germacrene D                            | 1474 | 1649 | 3.3  | 1.2  | –   | 13.7 | 1.8  | – | 1.5  | 8.3  |
| $\beta$ -Selinene                       | 1478 | 1656 | 1.1  | 1.9  | –   | 2.1  | 1.8  | – | 1.2  | 1.1  |
| <i>allo</i> -Aromadendr-<br>9-ene       | 1481 | 1629 | –    | –    | –   | –    | –    | – | 0.3  | –    |
| <i>trans</i> - $\beta$ -<br>Bergamotene | 1481 | 1633 | –    | 0.5  | –   | –    | –    | – | –    | –    |
| $\delta$ -Selinene                      | 1482 | 1639 | 0.2  | –    | –   | 0.5  | –    | – | –    | 0.2  |
| Unknown VIII                            | 1482 | 1649 | 0.3  | –    | –   | –    | 2.8  | – | –    | –    |
| Unknown IX                              | 1482 | 1650 | –    | –    | –   | 0.7  | –    | – | –    | –    |
| <i>trans</i> -Muurolo-<br>4(15),5-diene | 1484 | 1656 | –    | 0.2  | –   | –    | –    | – | 0.2  | 0.2  |
| Viridiflorene                           | 1488 | 1638 | –    | –    | –   | –    | –    | – | 0.8  | –    |
| Valencene                               | 1488 | 1659 | –    | –    | –   | 0.4  | –    | – | 0.4  | –    |
| $\alpha$ -Selinene                      | 1488 | 1662 | 1.2  | 2.2  | –   | 0.9  | 1.8  | – | 1.8  | 1.3  |
| <i>epi</i> -Cubebol                     | 1488 | 1836 | –    | –    | –   | –    | –    | – | 0.3  | 0.1  |
| Unknown X                               | 1493 | 1662 | –    | –    | –   | 0.4  | 1.4  | – | –    | –    |
| Isorotundene                            | 1494 | 1658 | –    | –    | –   | –    | –    | – | 0.3  | –    |
| Curzerene                               | 1494 | 1813 | 29.7 | 37.8 | –   | –    | 18.7 | – | tr   | 32.6 |
| $\alpha$ -Muurolene                     | 1497 | 1669 | –    | 0.5  | –   | 0.4  | 0.3  | – | 1.0  | 0.4  |
| Germacrene A                            | 1497 | 1697 | 0.4  | –    | –   | 0.2  | 0.2  | – | –    | 0.1  |
| $\delta$ -Amorphene                     | 1502 | 1669 | 0.1  | –    | –   | 0.5  | 0.1  | – | 0.2  | 0.1  |
| (Z)- $\alpha$ -Bisabolene               | 1502 | 1683 | –    | 4.8  | –   | –    | –    | – | –    | 0.2  |
| $\beta$ -Bisabolene                     | 1507 | 1679 | –    | 1.2  | 0.1 | –    | –    | – | –    | 0.1  |
| $\gamma$ -Cadinene                      | 1508 | 1697 | 0.1  | 0.9  | –   | 1.2  | 0.4  | – | 24.0 | 2.0  |
| (Z)- $\gamma$ -Bisabolene               | 1510 | 1680 | –    | –    | –   | –    | –    | – | 0.3  | –    |
| Cubebol                                 | 1510 | 1887 | –    | –    | –   | –    | –    | – | 0.4  | tr   |
| Unknown XI                              | 1516 | 1701 | –    | –    | –   | 0.3  | –    | – | –    | –    |
| $\delta$ -Cadinene                      | 1519 | 1701 | 0.4  | 2.3  | tr  | 1.7  | 0.9  | – | 8.9  | 1.4  |
| <i>cis</i> -Calamenene                  | 1519 | 1767 | –    | –    | –   | 0.1  | –    | – | 0.6  | –    |
| Unknown XII                             | 1520 |      | –    | –    | –   | 0.5  | –    | – | –    | –    |
| Selina-4(15),7(11)-<br>diene            | 1527 | 1713 | 0.2  | 0.4  | –   | 0.1  | 0.3  | – | –    | 0.1  |
| $\alpha$ -Cadinene                      | 1532 | 1732 | –    | 0.2  | –   | 0.2  | –    | – | 1.9  | 0.1  |
| Selina-3,7(11)-<br>diene                | 1533 | 1713 | 0.2  | 0.4  | –   | tr   | 0.3  | – | –    | 0.3  |
| $\alpha$ -Calacorene                    | 1535 | 1848 | 0.1  | 0.4  | –   | 0.2  | 0.1  | – | 0.2  | 0.1  |
| $\alpha$ -Elemol                        | 1544 | 2026 | 0.2  | 1.1  | –   | 0.5  | 0.4  | – | 0.1  | 1.1  |



Table S3. *Cont.*

|                                    |      |      |             |             |             |             |             |             |             |             |
|------------------------------------|------|------|-------------|-------------|-------------|-------------|-------------|-------------|-------------|-------------|
| Longicamph-enilone                 | 1547 | 1947 | –           | –           | 0.3         | –           | –           | –           | –           | –           |
| Germacrene B                       | 1548 | 1760 | 4.6         | 1.3         | –           | 0.7         | 2.6         | –           | 0.3         | 4.9         |
| 1,5-Epoxy-salvial-4(14)-ene        | 1557 |      | 0.1         | 0.1         | –           | 0.3         | 0.1         | –           | –           | 0.1         |
| Furanoeudesma-1,4-diene            | 1570 | 1977 | 0.8         | –           | –           | –           | 0.4         | –           | –           | –           |
| Caryophyllene oxide                | 1572 | 1905 | 0.1         | 0.2         | 0.2         | 0.2         | 0.1         | –           | 0.4         | 0.1         |
| Viridiflorol                       | 1582 | 2019 | –           | –           | –           | –           | –           | –           | 0.5         | tr          |
| Gleenol                            | 1587 | 1982 | –           | –           | –           | –           | –           | –           | 0.2         | –           |
| $\beta$ -Elemenone                 | 1597 | 2019 | 0.1         | –           | –           | –           | –           | –           | –           | 0.5         |
| Curzerenone                        | 1597 | 2140 | 0.6         | 0.3         | –           | 2.6         | 2.2         | –           | 0.1         | 2.7         |
| 10- <i>epi</i> -Cubenol            | 1603 | 1998 | –           | 0.1         | –           | 0.3         | –           | –           | 3.3         | 0.2         |
| Junenol                            | 1607 | 1982 | –           | 0.3         | –           | 0.2         | –           | –           | –           | –           |
| Unknown XIII                       | 1613 | 2036 | –           | –           | –           | –           | –           | –           | –           | 0.3         |
| Furanoeudesma-1,3-diene            | 1619 | 2047 | 17.4        | –           | –           | –           | 23.9        | –           | tr          | –           |
| 1- <i>epi</i> -Cubenol             | 1620 | 1998 | –           | –           | –           | –           | –           | –           | 0.2         | 0.1         |
| Alismol                            | 1620 | 2191 | –           | 0.1         | –           | 0.7         | –           | –           | 0.1         | tr          |
| Lindestrene                        | 1625 | 2051 | 8.7         | –           | –           | –           | 6.5         | –           | tr          | –           |
| $\tau$ -Cadinol                    | 1633 | 2107 | 0.2         | 0.2         | –           | 0.6         | 0.2         | –           | 16.9        | 0.6         |
| $\tau$ -Muurolol                   | 1633 | 2123 | –           | 0.1         | –           | 0.1         | –           | –           | 0.3         | –           |
| $\beta$ -Eudesmol                  | 1640 | 2157 | 0.1         | 0.2         | –           | 0.2         | 0.1         | –           | 0.6         | 0.1         |
| Valerianol                         | 1643 | 2146 | –           | –           | –           | –           | –           | –           | –           | 0.4         |
| Unknown XIV                        | 1645 | 2026 | –           | 0.3         | –           | –           | –           | –           | –           | –           |
| Atractylone                        | 1645 | 2040 | 0.1         | 0.5         | –           | –           | 0.3         | –           | –           | 0.1         |
| $\alpha$ -Eudesmol                 | 1645 | 2150 | 0.1         | 0.2         | –           | tr          | 0.1         | –           | 0.2         | 0.1         |
| Furanodiene                        | 1651 | 2040 | 0.4         | 1.1         | –           | –           | 0.4         | –           | –           | –           |
| $\alpha$ -Cadinol                  | 1651 | 2165 | –           | 0.1         | –           | 0.1         | –           | –           | 0.3         | 0.1         |
| Longibornyl acetate                | 1672 | 1953 | –           | –           | 0.5         | –           | –           | –           | –           | –           |
| $\alpha$ -Elemyl acetate           | 1674 | 1977 | 0.8         | –           | –           | –           | 0.7         | –           | –           | –           |
| 2-Methoxy-isofurano-germacrene (?) | 1682 | 2102 | 0.3         | –           | –           | –           | –           | –           | –           | –           |
| Unknown XV                         | 1682 | 2107 | 1.7         | 1.7         | –           | –           | 0.9         | –           | –           | 1.3         |
| Germacrene                         | 1684 | 2142 | 0.4         | 0.3         | –           | 0.2         | 0.3         | –           | –           | 1.8         |
| 2-Methoxy-furanodiene              | 1714 | 2168 | 1.1         | –           | –           | –           | 0.4         | –           | –           | –           |
| Unknown XVI                        | 1731 | 2364 | –           | –           | –           | 0.6         | 0.2         | –           | –           | –           |
| Unknown XVII                       | 1732 | 2277 | –           | –           | –           | –           | –           | –           | –           | 0.8         |
| Cembrene                           | 1919 |      | –           | –           | 0.2         | –           | 0.1         | –           | –           | –           |
| (3 <i>E</i> )-Cembrene A           | 1949 | 2171 | –           | –           | 0.3         | –           | 0.1         | –           | –           | –           |
| Dolabella-6,10,15-triene (?)       | 1955 | 2209 | –           | –           | –           | –           | –           | –           | 0.4         | –           |
| Unknown XVIII                      |      | 1197 | –           | –           | 0.3         | –           | –           | –           | –           | –           |
| <b>TOTAL</b>                       |      |      | <b>94.9</b> | <b>95.0</b> | <b>94.1</b> | <b>93.8</b> | <b>95.0</b> | <b>94.2</b> | <b>96.0</b> | <b>94.8</b> |

Main ions of unknown compounds [*m/z* (relative intensity); molecular ion bolded out if known]: Unknown I : 91 (100), 92 (47), 65 (11)... 134 (1); Unknown II : 79 (100), 93 (60), 43 (40)... 152 (18); Unknown III : 93 (100), 59 (85), 81 (36), 92 (35); Unknown IV : 93 (100), 43 (50), 121 (50), 136 (35); Unknown V : 91 (100), 161 (92), 105 (85)... 204 (46); Unknown VI : 161 (100), 105 (70), 91 (51)... 204 (45); Unknown VII : 121 (100), 93 (86), 161 (61)... 204 (19); Unknown

VIII : 79 (100), 107 (99), 91 (88)... 204 (12); Unknown IX : 161 (100), 189 (96), 91 (74), 204 (73); Unknown X : 93 (100), 81 (96), 80 (80), 147 (68); Unknown XI : 121 (100), 93 (78), 136 (56)... 204 (13); Unknown XII : 122 (100), 107 (38), 105 (26)... 204 (5); Unknown XIII : 91 (100), 133 (100), 105 (91)... 218 (33); Unknown XIV : 216 (100), 145 (76), 201 (61), 159 (36); Unknown XV : 108 (100), 216 (29), 93 (26), 109 (21); Unknown XVI : 159 (100), 145 (37), 160 (28)... 230 (11); Unknown XVII : 175 (100), 232 (52), 161 (39), 162 (32); Unknown XVIII : 93 (100), 79 (93), 137 (76)... 152 (9).

Aliphatic ester: Octyl acetate.

Diterpenes: Cembrene, (3*E*)-Cembrene A, Dolabella-6,10,15-triene.

Monoterpenes:  $\alpha$ -Thujene,  $\alpha$ -Pinene, Camphene, Unknown I, Thuja-2,4(10)-diene, *meta*-Cymene,  $\beta$ -Pinene, Sabinene, Menthatriene isomer,  $\Delta^3$ -Carene,  $\alpha$ -Terpinene, *ortho*-Cymene, *para*-Cymene, Sylvestrene, Limonene,  $\beta$ -Phellandrene,  $\gamma$ -Terpinene, *meta*-Cymenene, Terpinolene, *para*-Cymenene.

Monoterpenic alcohols: *endo*-Fenchol, *trans*-Pinocarveol, *trans*-Verbenol, *meta*-Mentha-4,6-dien-8-ol, Phellandrenol isomer, Borneol,  $\alpha$ -Phellandren-8-ol, *cis*-Sabinol, Terpinen-4-ol, *meta*-Cymen-8-ol, *para*-Cymen-8-ol,  $\alpha$ -Terpineol, Myrtenol, *trans*-Carveol.

Monoterpenic aldehydes:  $\alpha$ -Campholenal, Myrtenal, Cuminal.

Monoterpenic esters: Bornyl acetate, Unknown IV,  $\alpha$ -Terpinyl acetate.

Monoterpenic ketones:  $\beta$ -Thujone, Pinocamphone, Pinocarvone, Umbellulone, Verbenone.

Normonoterpenic ketone: Nopinone.

Norsesquiterpenic ketone: Longicamphenilone.

Oxygenated monoterpenes: Unknown II, Unknown III, Unknown XVIII.

Oxygenated sesquiterpenes: Unknown XIII, Unknown XIV, Unknown XV, Unknown XVII.

Sesquiterpenes:  $\delta$ -Elemene isomer,  $\delta$ -Elemene, Bicycloelemene,  $\alpha$ -Longipinene,  $\alpha$ -Cubebene, Cyclosativene I, Longicyclene,  $\alpha$ -Ylangene,  $\alpha$ -Copaene,  $\beta$ -Bourbonene, 1,5-*diepi*- $\beta$ -Bourbonene, *cis*- $\beta$ -Elemene, Sativene,  $\beta$ -Cubebene,  $\beta$ -Elemene, Longifolene,  $\alpha$ -Gurjunene,  $\beta$ -Ylangene, *cis*- $\alpha$ -Bergamotene,  $\beta$ -Caryophyllene, Cascarilladiene,  $\beta$ -Copaene,  $\gamma$ -Elemene, *trans*- $\alpha$ -Bergamotene,  $\alpha$ -Guaiane, 6,9-Guaiadiene, Isogermacrene D, Unknown V, Unknown VI,  $\alpha$ -Humulene, *allo*-Aromadendrene, *cis*-Cadina-1(6),4-diene, *cis*-Muurola-4(15),5-diene, Unknown VII, *trans*-Cadina-1(6),4-diene, Selina-4,11-diene,  $\gamma$ -Muurolene, Germacrene D,  $\beta$ -Selinene, *allo*-Aromadendr-9-ene, *trans*- $\beta$ -Bergamotene,  $\delta$ -Selinene, Unknown VIII, Unknown IX, *trans*-Muurola-4(15),5-diene, Viridiflorene, Valencene,  $\alpha$ -Selinene, Isorotundene,  $\alpha$ -Muurolene, Germacrene A,  $\delta$ -Amorphene, (*Z*)- $\alpha$ -Bisabolene,  $\beta$ -Bisabolene,  $\gamma$ -Cadinene, (*Z*)- $\gamma$ -Bisabolene, Unknown XI,  $\delta$ -Cadinene, *cis*-Calamenene, Unknown XII, Selina-4(15),7(11)-diene,  $\alpha$ -Cadinene, Selina-3,7(11)-diene,  $\alpha$ -Calacorene, Germacrene B.

Sesquiterpenic alcohols: *epi*-Cubebol, Cubebol,  $\alpha$ -Elemol, Viridiflorol, Gleenol, 10-*epi*-Cubenol, Junenol, 1-*epi*-Cubenol, Alismol,  $\tau$ -Cadinol,  $\tau$ -Muurolol,  $\beta$ -Eudesmol, Valerianol,  $\alpha$ -Eudesmol,  $\alpha$ -Cadinol.

Sesquiterpenic esters: Longibornyl acetate,  $\alpha$ -Elemyl acetate, Curzerene, 1,5-Epoxyisoval-4(14)-ene, Furanoesdesma-1,4-diene, Caryophyllene oxide, Furanoesdesma-1,3-diene, Lindestrene, Atractylone, Furanodiene, 2-Methoxyisofuranogermacrene, 2-Methoxyfuranodiene.

Sesquiterpenic ketones:  $\beta$ -Elemenone, Curzerenone, Germacrone.

Simple phenolic: Toluene, *ortho*-Methylanisole, 3,5-Dimethoxytoluene, 4-Vinylguaiacol.

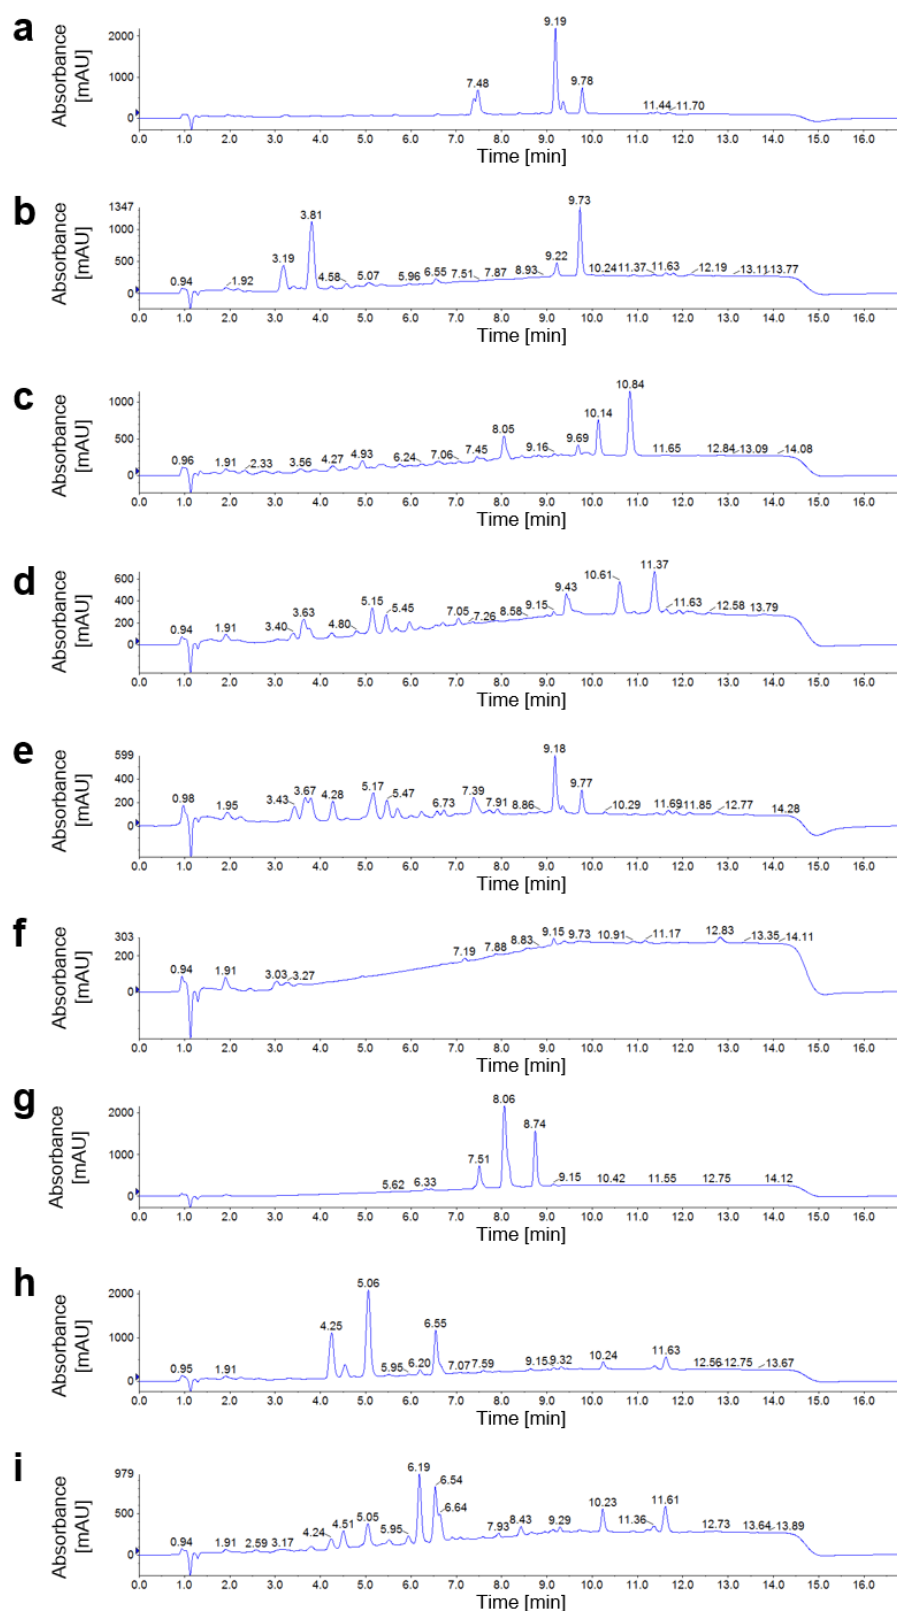

**Figure S3.** Total wavelength chromatograms (TWC) of *Commiphora* oleogum resin extracts with detection at 210 nm, 254 nm, and 280 nm. (a) *C. myrrha*. (b) *C. erythraea*. (c) *C. mukul*. (d) *C. kataf*. (e) *C. holtziana*. (f) *C. confusa*. (g) *C. kua*. (h) *Commiphora* oleogum resin from Tarraxo (Somalia). (i) *Commiphora* oleogum resin from Ogaden (Ethiopia).  $t_R((E)\text{-Guggulsterone}) = 4.3$  min,  $t_R((Z)\text{-Guggulsterone}) = 4.9$  min,  $t_R(\text{Curzerenone}) = 4.3$  min,  $t_R(\text{Myrrhone}) = 6.0$  min, and  $t_R(\text{Furanoedesma-1,3-diene -}) = 9.2$  min.

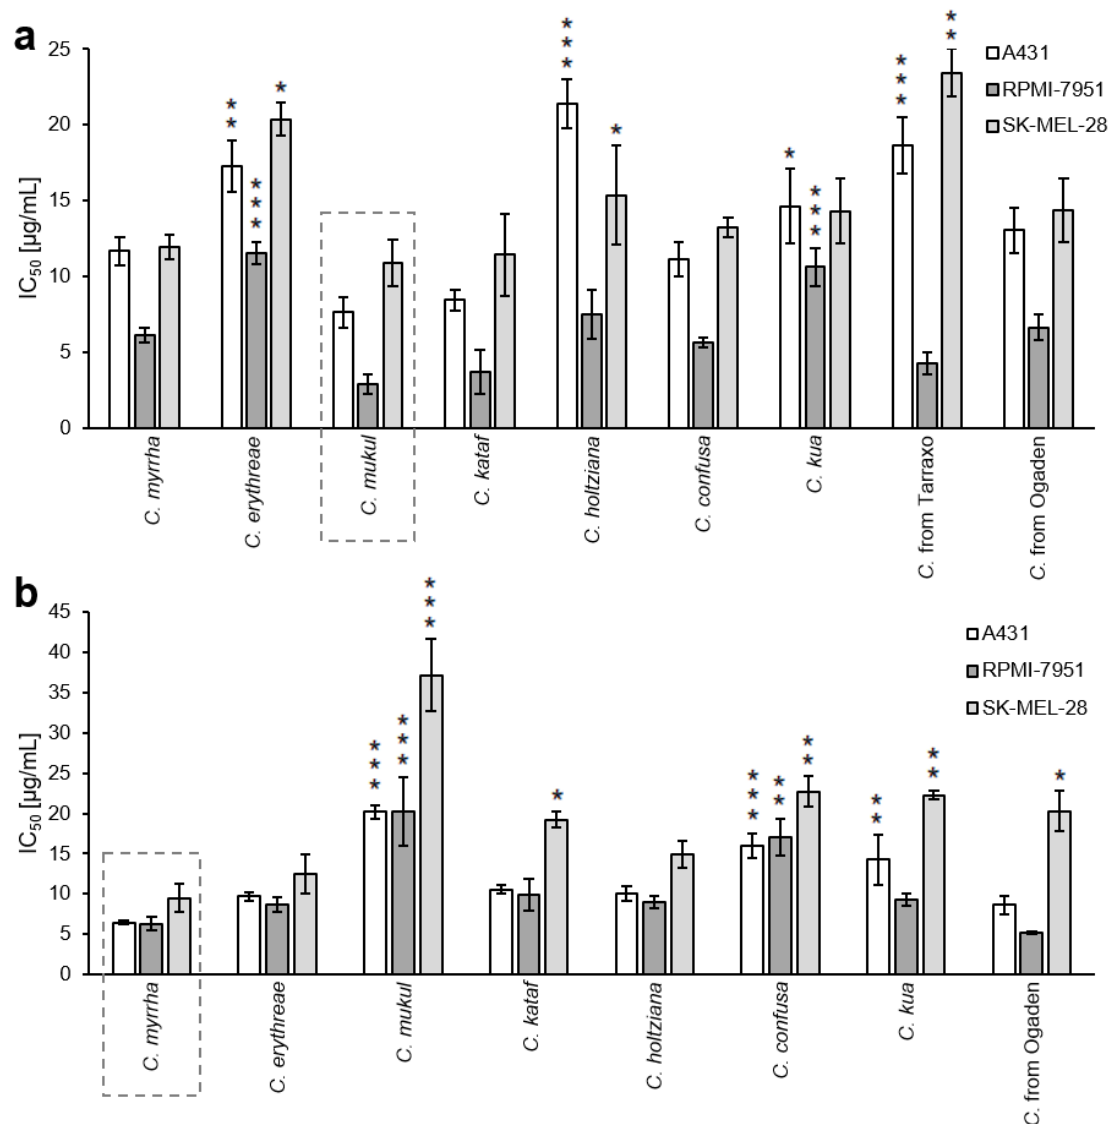

**Figure S4.** Cytotoxicity of *Commiphora* extracts and essential oils against the epidermoid carcinoma cell line A431 and the malignant melanoma cell lines RPMI-7951 and SK-MEL-28. (a) Cytotoxicity of *Commiphora* extracts: The extract obtained from *C. mukul* exhibited the highest cytotoxic efficacies against all investigated skin cancer cell lines. (b) Cytotoxicity of *Commiphora* essential oils: Comparison of the individual samples revealed that the essential oil from *C. myrrha* exhibited the highest cytotoxicity against A431 and SK-MEL-28 cell lines and high cytotoxicity against RPMI-7951 cells. XTT assay, 72 h,  $n = 3$  (and each experiment additionally performed in triplicates). All data are mean  $\pm$  standard error of mean (SEM). Statistical evaluation by ANOVA and *post hoc* Dunnett's test with \*  $p < 0.05$ , \*\*  $p < 0.01$ , and \*\*\*  $p < 0.001$ . Comparison of the individual samples with (a) *C. mukul* extract or (b) *C. myrrha* essential oil.
